# Supplementary material for: Carbon nanotubes/Al2O3 composite derived from catalytic reforming of the pyrolysis volatiles of the mixture of polyethylene and lignin for highly-efficient removal of Pb(ii)
Source: Royal Society of Chemistry journal article supplement (doi:10.1039/d1ra06762a), 2021-01-01
Supplement: d1ra06762a1.pdf [file d1ra06762a1.pdf]

## Supplementary materials

### 1 Materials and Methods

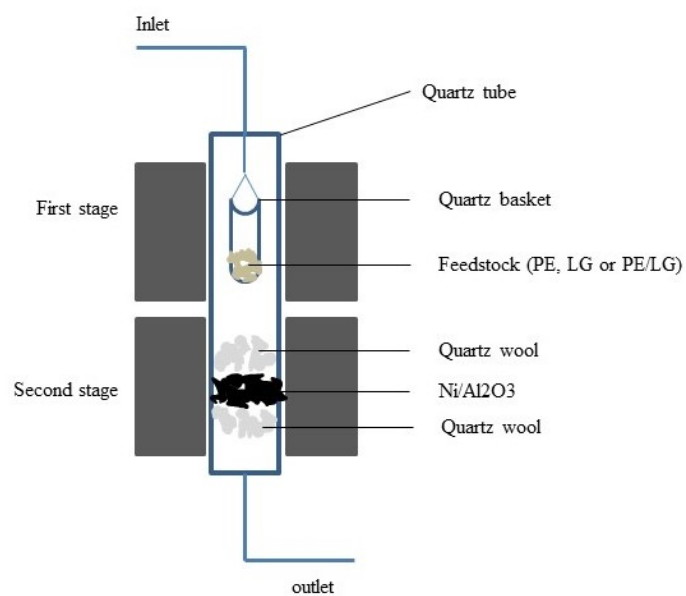

**Fig. S1** Setup employed in present study

## 2 Results and discussion

### 2.1 Characteristics of fresh NiO/Al<sub>2</sub>O<sub>3</sub> catalyst

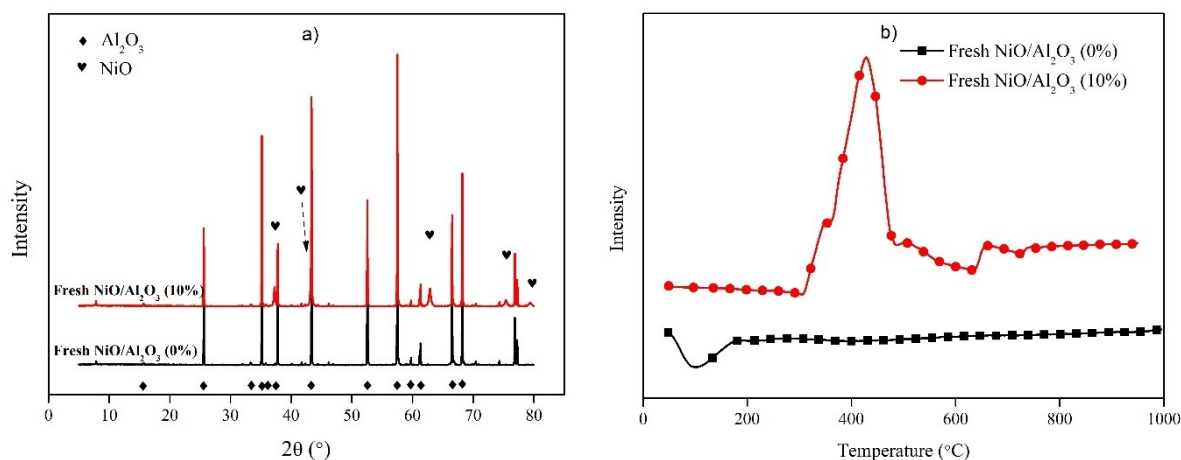

**Fig. S2** XRD patterns (a) and H<sub>2</sub>-TPR curves (b) of fresh NiO/Al<sub>2</sub>O<sub>3</sub> with 0% and 10% Ni content

**Fig. S2a** shows the XRD results of the home-made fresh NiO/Al<sub>2</sub>O<sub>3</sub> with different Ni content (0%-10%). Two types of substances, NiO (spade) and Al<sub>2</sub>O<sub>3</sub> (diamond) can be found according to the diffraction peaks. Particularly, PDF card (JCPDS 78-0643) reveals that the characteristic peaks of NiO species mainly occur at  $2\theta = 37.3^\circ, 43.4^\circ, 63.0^\circ, 75.6^\circ$  and  $79.6^\circ$ , which are index to (1 1 1), (2 0 0), (2 2 0), (3 1 1) and (3 2 2) NiO [1]. Ni content in fresh NiO/Al<sub>2</sub>O<sub>3</sub> is further detected by AAS and the result is presented in **Table S1**. It can be seen that Ni content ( $m_{\text{Ni}}/m_{\text{Al}_2\text{O}_3}$ ) of fresh NiO/Al<sub>2</sub>O<sub>3</sub> (0%) and fresh NiO/Al<sub>2</sub>O<sub>3</sub> (10%) are 0 and 100.38 mg/g, respectively. This indicates that the real Ni content in fresh NiO/Al<sub>2</sub>O<sub>3</sub> (0%) and fresh NiO/Al<sub>2</sub>O<sub>3</sub> (10%) are 0% and 10.04%, respectively, which is highly closed to theoretical ones (i.e., 0% and 10%).

**Table S1** Ni content in fresh NiO/Al<sub>2</sub>O<sub>3</sub> catalysts detected by AAS

|                                                | Ni content <sup>a</sup> |      | Ni content <sup>b</sup> |       |
|------------------------------------------------|-------------------------|------|-------------------------|-------|
|                                                | mg/g                    | %    | mg/g                    | %     |
| Fresh NiO/Al <sub>2</sub> O <sub>3</sub> (0%)  | 0                       | 0    | 0                       | 0     |
| Fresh NiO/Al <sub>2</sub> O <sub>3</sub> (10%) | 89.01                   | 8.90 | 100.38                  | 10.04 |

a is the ratio of  $m_{Ni}$  to  $m_{(NiO+Al_2O_3)}$ , bis the ratio of  $m_{Ni}$  to  $m_{Al_2O_3}$

The H<sub>2</sub>-TPR curves of fresh NiO/Al<sub>2</sub>O<sub>3</sub> with different Ni content (0%-10%) are showed in **Fig. S2b** to clarify the interaction between NiO and substrate (i.e., Al<sub>2</sub>O<sub>3</sub>). Reduction peak related to NiO can not be found in fresh NiO/Al<sub>2</sub>O<sub>3</sub> (0%) due to it contains no Ni content. Whereas fresh NiO/Al<sub>2</sub>O<sub>3</sub> (10%) exhibits several broad and asymmetric H<sub>2</sub> consumption peaks, which can attribute to the reduction of NiO possessing varying strength of interaction-bonding with Al<sub>2</sub>O<sub>3</sub>. In detail, the pronounced H<sub>2</sub> consumption peak centered at 428 °C assigns to the reduction of NiO species, which have a weak interaction with Al<sub>2</sub>O<sub>3</sub>. By comparison, two relatively weak H<sub>2</sub> consumption peaks occurred at 508 and 660 °C correspond to the reduction of the Ni<sup>2+</sup> ions in strong octahedral and tetrahedral coordination with Al<sub>2</sub>O<sub>3</sub>, respectively [2]. It is reported that peaks at 400-500, 500-600 and > 600 °C can be assigned to weak, medium and strong interaction between NiO and Al<sub>2</sub>O<sub>3</sub>, respectively [3]. A weak interaction between active component and substrate would result in the migration and aggregation of active component when the catalyst is employed in a catalytic reforming process. While the catalyst possesses a relatively stable structure when the active component and substrate exhibit a medium or strong

interaction.

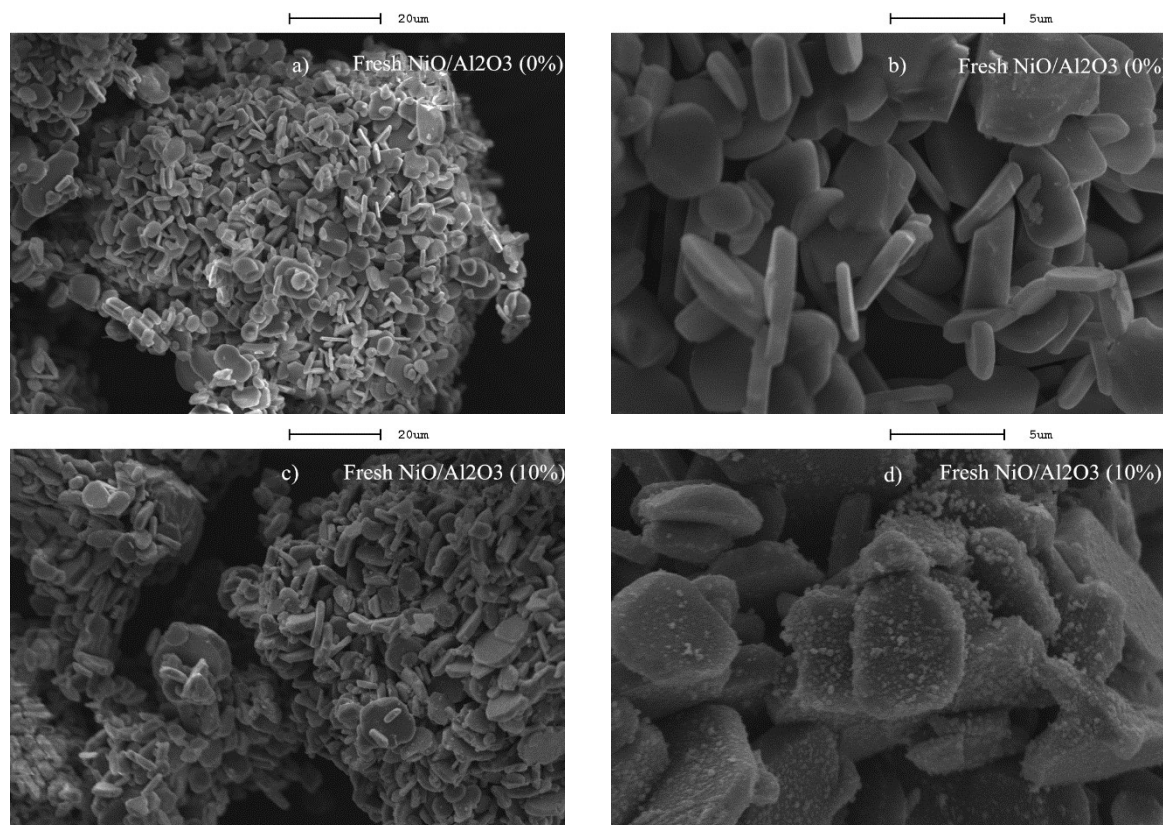

**Fig. 2** SEM images of fresh NiO/Al<sub>2</sub>O<sub>3</sub> with different Ni content, (a-b) 0%, (c-b) 10%

The morphological features of fresh NiO/Al<sub>2</sub>O<sub>3</sub> with different Ni content (0%-10%) characterized using SEM are presented in **Fig. S3**. It can be found that Al<sub>2</sub>O<sub>3</sub> employed as substrate in NiO/Al<sub>2</sub>O<sub>3</sub> catalyst shows a round cake-like structure with a diameter in the range of 2-6 μm and a thickness ranging from 0.5 to 1.2 μm (**Fig. S3 a-b**). After the treatment of Ni (fresh NiO/Al<sub>2</sub>O<sub>3</sub> (10%)), a large amount of nano NiO particles with a diameter in the range of 40-120 nm uniformly dispersed over the surface of Al<sub>2</sub>O<sub>3</sub> can be observed in **Fig. S3 c-d**. Good dispersion and uniform particle size of NiO would provide fresh NiO/Al<sub>2</sub>O<sub>3</sub> (10%) a superior catalytic capability. The textural properties of fresh NiO/Al<sub>2</sub>O<sub>3</sub> with different Ni content (0%-

10%) is shown in **Table S2**. The specific surface area (SSA), total pore volume (TPV) and average pore diameter (APD) of fresh NiO/Al<sub>2</sub>O<sub>3</sub> (0%) are 23.29 m<sup>2</sup>/g, 0.07 cm<sup>3</sup>/g and 13.24, respectively. According to the SEM results as shown in **Fig. S3**, the pore structure of fresh NiO/Al<sub>2</sub>O<sub>3</sub> (0%) may be originated from the randomly stacking of the round cake-like Al<sub>2</sub>O<sub>3</sub>. The introduction of nano NiO particles via an impregnation process in combination with a calcination process causes the evident decrease of SSA and TPV due to the presence of nano NiO particles that might block the porous structure.

**Table S2** Pore characteristics of fresh Ni/Al<sub>2</sub>O<sub>3</sub> catalysts with different Ni content

|                                                | SSA <sup>a</sup>    | MP SSA <sup>b</sup> | TPV <sup>c</sup>     | MPV <sup>d</sup>     | APD <sup>e</sup> |
|------------------------------------------------|---------------------|---------------------|----------------------|----------------------|------------------|
|                                                | (m <sup>2</sup> /g) | (m <sup>2</sup> /g) | (cm <sup>3</sup> /g) | (cm <sup>3</sup> /g) | (nm)             |
| Fresh NiO/Al <sub>2</sub> O <sub>3</sub> (0%)  | 23.29               | 4.07                | 0.07                 | 0.002                | 13.24            |
| Fresh NiO/Al <sub>2</sub> O <sub>3</sub> (10%) | 1.71                | 1.32                | 0.01                 | 0.0006               | 18.68            |

a is specific surface area; b is micropore specific surface area, c is total pore volume; d is micropore pore volume; e is average pore diameter.

**Table S3** Comparison of the maximum capacity of Pb(II) adsorption by CNTs-related adsorbents

| Adsorbents                                                                   | Adsorption capacity (mg/g) | Conditions                       | References    |
|------------------------------------------------------------------------------|----------------------------|----------------------------------|---------------|
| <b>Pristine materials</b>                                                    |                            |                                  |               |
| Acetylene-derived CNTs                                                       | 2.05                       | pH 6.0, at 20 °C, 48 h           | [4]           |
| Propylene-derived CNTs                                                       | 17.44                      | pH 5.0, at room temperature, 6 h | [5]           |
| Commercial CNTs                                                              | 2.94                       | pH 6.2, at 25 °C, 200 min        | [6]           |
| Acetylene-derived CNTs                                                       | 17.54                      | pH 6.0, at 20 °C, 24 h           | [7]           |
| $\gamma$ -Al <sub>2</sub> O <sub>3</sub>                                     | 12.64                      | pH 3.0, at 25 °C                 | [8]           |
| Al <sub>2</sub> O <sub>3</sub>                                               | 22.4                       | pH 4.0, at 25 °C, 24 h           | [9]           |
| <b>Composites</b>                                                            |                            |                                  |               |
| CNTs/bagasse composite                                                       | 56.6                       | pH 4.5, at 28 °C, 24 h           | [10]          |
| Oxidized CNTs-Cl <sub>2</sub> composite                                      | 87.57                      | pH 5.0, at 45 °C, 2 h            | [11]          |
| CNTs/CoFe <sub>2</sub> O <sub>4</sub> composite                              | 140.4                      | pH 6.0, at 30 °C, 12 h           | [12]          |
| CNTs@SiO <sub>2</sub> -NH <sub>2</sub> composite                             | 147.1                      | pH 5.2, at 45 °C, 24 h           | [13]          |
| CNTs@zeolite composite                                                       | 55.74                      | pH 5.0, at 40 °C, 12 h           | [14]          |
| Organo-functionalized SiO <sub>2</sub> -Al <sub>2</sub> O <sub>3</sub>       | 92.0                       | pH 6.5, at 25 °C, 2 h            | [15]          |
| 2,4-dinitrophenylhydrazine-modified $\gamma$ -Al <sub>2</sub> O <sub>3</sub> | 100.00                     | pH 5.0, at 25 °C, 1.5 h          | [16]          |
| Al <sub>2</sub> O <sub>3</sub> -supported iron oxide                         | 29.01                      | pH 5.0, at 45 °C, 48 h           | [17]          |
| PE/LG-CNTs-Ni/Al <sub>2</sub> O <sub>3</sub> composites                      | 146.077                    | pH 5.0, at 25 °C, 8 h            | Present study |

## References:

- [1] Z. Zhang, X. Hu, L. Zhang, Y. Yang, Q. Li, H. Fan, Q. Liu, T. Wei, C.-Z. Li, Steam reforming of guaiacol over Ni/Al<sub>2</sub>O<sub>3</sub> and Ni/SBA-15: Impacts of support on catalytic behaviors of nickel and properties of coke, *Fuel Processing Technology*, 191 (2019) 138-151.
- [2] V. Claude, J.G. Mahy, J. Geens, S.D. Lambert, Ni-doped  $\gamma$ -Al<sub>2</sub>O<sub>3</sub> as secondary catalyst for bio-syngas purification: influence of Ni loading, catalyst preparation, and gas composition on catalytic activity, *Materials Today Chemistry*, 13 (2019) 98-109.
- [3] Y. Xu, X.-h. Du, J. Li, P. Wang, J. Zhu, F.-j. Ge, J. Zhou, M. Song, W.-y. Zhu, A comparison of Al<sub>2</sub>O<sub>3</sub> and SiO<sub>2</sub> supported Ni-based catalysts in their performance for the dry reforming of methane, *Journal of Fuel Chemistry and Technology*, 47 (2019) 199-208.
- [4] D. Xu, X. Tan, C. Chen, X. Wang, Removal of Pb(II) from aqueous solution by oxidized multiwalled carbon nanotubes, *Journal of Hazardous Materials*, 154 (2008) 407-416.
- [5] Y.-H. Li, S. Wang, J. Wei, X. Zhang, C. Xu, Z. Luan, D. Wu, B. Wei, Lead adsorption on carbon nanotubes, *Chemical Physics Letters*, 357 (2002) 263-266.
- [6] G.D. Vuković, A.D. Marinković, S.D. Škapin, M.Đ. Ristić, R. Aleksić, A.A. Perić-Grujić, P.S. Uskoković, Removal of lead from water by amino modified multi-walled carbon nanotubes, *Chemical Engineering Journal*, 173 (2011) 855-865.
- [7] X. Ren, D. Shao, S. Yang, J. Hu, G. Sheng, X. Tan, X. Wang, Comparative study of Pb(II) sorption on XC-72 carbon and multi-walled carbon nanotubes from aqueous

solutions, *Chemical Engineering Journal*, 170 (2011) 170-177.

[8] Y.J.O. Asencios, M.R. Sun-Kou, Synthesis of high-surface-area  $\gamma$ -Al<sub>2</sub>O<sub>3</sub> from aluminum scrap and its use for the adsorption of metals: Pb(II), Cd(II) and Zn(II), *Applied Surface Science*, 258 (2012) 10002-10011.

[9] H. Zhang, L. Gu, L. Zhang, S. Zheng, H. Wan, J. Sun, D. Zhu, Z. Xu, Removal of aqueous Pb(II) by adsorption on Al<sub>2</sub>O<sub>3</sub>-pillared layered MnO<sub>2</sub>, *Applied Surface Science*, 406 (2017) 330-338.

[10] I.A.A. Hamza, B.S. Martincigh, J.C. Ngila, V.O. Nyamori, Adsorption studies of aqueous Pb(II) onto a sugarcane bagasse/multi-walled carbon nanotube composite, *Physics and Chemistry of the Earth, Parts A/B/C*, 66 (2013) 157-166.

[11] J.-Y. Yang, X.-Y. Jiang, F.-P. Jiao, J.-G. Yu, X.-Q. Chen, Fabrication of diiodocarbene functionalized oxidized multi-walled carbon nanotube and its aqueous adsorption performance toward Pb(II), *Environmental Earth Sciences*, 76 (2017).

[12] L. Zhou, L. Ji, P.-C. Ma, Y. Shao, H. Zhang, W. Gao, Y. Li, Development of carbon nanotubes/CoFe<sub>2</sub>O<sub>4</sub> magnetic hybrid material for removal of tetrabromobisphenol A and Pb(II), *Journal of Hazardous Materials*, 265 (2014) 104-114.

[13] K. Yang, Z. Lou, R. Fu, J. Zhou, J. Xu, S.A. Baig, X. Xu, Multiwalled carbon nanotubes incorporated with or without amino groups for aqueous Pb(II) removal: Comparison and mechanism study, *Journal of Molecular Liquids*, 260 (2018) 149-158.

[14] D.K. Venkata Ramana, D.H. Kumar Reddy, B.N. Kumar, K. Seshaiyah, G.P. Chandra Rao, C. Lu, Adsorption of Pb(II) from Aqueous Solutions by Chemically



Modified Zeolite supported Carbon Nanotubes: Equilibrium, Kinetic, and Thermodynamic Studies, *Separation Science and Technology*, 48 (2013) 403-412.

[15] M. Boroumand Jazi, M. Arshadi, M.J. Amiri, A. Gil, Kinetic and thermodynamic investigations of Pb(II) and Cd(II) adsorption on nanoscale organo-functionalized SiO<sub>2</sub>Al<sub>2</sub>O<sub>3</sub>, *Journal of Colloid and Interface Science*, 422 (2014) 16-24.

[16] A. Afkhami, M. Saber-Tehrani, H. Bagheri, Simultaneous removal of heavy-metal ions in wastewater samples using nano-alumina modified with 2,4-dinitrophenylhydrazine, *Journal of Hazardous Materials*, 181 (2010) 836-844.

[17] Y.-H. Huang, C.-L. Hsueh, C.-P. Huang, L.-C. Su, C.-Y. Chen, Adsorption thermodynamic and kinetic studies of Pb(II) removal from water onto a versatile Al<sub>2</sub>O<sub>3</sub>-supported iron oxide, *Separation and Purification Technology*, 55 (2007) 23-29.
